# Supplementary material
Source: Research Square preprint supplement (doi:10.21203/rs.3.rs-9146397/v1)
Supplement: Supplementary file 1 [file 60ae2c42a3e2142510551487.docx]

# Additional file 1: The full comparative checklist table

This supplementary file contains the full comparative checklist table (eight municipalities and one health care region) as referenced in the manuscript. The wording has been standardised into academic British English, retaining the original meaning. Due to variations and gaps in the source material, some entries remain marked with a dash to indicate missing information.

| Category | Municipality 1 | Municipality 2 | Region 1 | Municipality 3 | Municipality 4 | Municipality 5 | Municipality 6 | Municipality 7 | Municipality 8 |
| --- | --- | --- | --- | --- | --- | --- | --- | --- | --- |
| Location in Sweden | Northern Sweden | Northern Sweden | Eastern Sweden | Central Sweden | Eastern Sweden | Eastern Sweden | Southern Sweden | Southern Sweden | Southern Sweden |
| Citizens | 23,000 | 49,000 | 177,000 | 24,000 | 143,000 | 36,000 | 13,000 | 17,000 | 86,000 |
| Document revised | No document | 2023 | 2022 | 2009 | 2019 | 2011 | 2021 | 2019 | 2022 |
| Prevention | — | GPS alarm; locked door; secure door lock mechanisms | Unknown | GPS alarm when required | — | Information provided to residents and relatives with emphasis on personal responsibility | — | — | — |
| Secondary prevention | — | — | Unknown | Risk analysis and action plan | — | Support to affected individuals | — | Dialogue with the resident | — |
| Checklist coverage | — | Action plan (6 steps): from discovery of absence to notification of supervisor and next-day staff | From discovery of absence to locating the person | Policy document, routines, and checklist | Documented routines: return after 2 hours if there is no response at the door | Action plan (6 steps) | Routine (13 steps) | From discovery of absence to follow-up (14 steps) | Checklist (7 steps) |
| Search by personnel | — | Alert dispatch center: staff search and engage home help services if needed | Extended search by all personnel | Step 1: rapid check of nearby environment | Review records; contact hospitals and relatives | Step 1–2: systematic search of premises and nearby areas; show Police where searches conducted | Step 1–4: staff search up to 500 m; internal search leader appointed | Staff search independently for 30 minutes | Step 1 |
| Contact with relatives | — | If the person is not found, relatives are notified | — | Notify legal guardian and relatives (Step 3) | — | Relatives notified last (Step 6) | Relatives notified (Step 8) | Step 2: relatives notified after 30 minutes and during follow-up | Step 3: relatives notified |
| Contact with manager | — | Notify head of department if the person cannot be located | Arrange search of hospital area | Area manager decides on Police contact | Manager contacted second to last | Priority 3: contact head of department; area manager notified | Contact nurse (Step 5); contact area manager (Step 7) | Step 3 | Contact nurse; head of department; manager |
| Contact emergency care | — | — | — | — | — | — | — | Emergency care contacted (Step 4) | — |
| Contact with Police | — | Call Police service number early (Step 4) | Police contacted after all internal measures exhausted | Police always contacted when a person has disappeared (not only missing) | Police contacted last | Call distress number (Step 4–5) | Emergency: call distress number; otherwise contact Police | Police called after 30 minutes | Police service number 114 (Step 6) |
| Responsibility for search | — | Personnel until Police arrive | Police assume responsibility | Staff search independently without disrupting Police operations | Police assume responsibility | — | Police responsible (Step 11) | Police assume responsibility | — |
| Description of characteristics | — | Staff provide information on habits, medical conditions, relatives, search areas, and previous disappearances | — | Life history document used | — | Yes | Includes name, personal number, emergency contacts, characteristics, clothing, habits, previous addresses, search areas, and relatives' contact details | Police informed No recent photos available | — |
| Internal organisational contact | — | Deputy head of department | Chief medical officer | Maintain calm and support relatives | — | Team discussions and internal support | Support from other home‑help units (Step 6) | Nurse contacted; home‑help staff assist; area manager contacted | Assistance from other departments |
| Documentation | — | — | — | — | — | — | — | Social documentation (Step 9) | — |
| When person is found | — | — | Distress call cancelled | Attend to the person; contact physician for psychiatric evaluation if needed; Police may assist; relatives informed | — | — | Report to hospital | All relevant parties informed | — |
| Follow‑up | — | Inform head of staff on next workday | — | — | — | Follow‑up offered to personnel (unclear if relatives included) | Follow‑up offered to personnel and relatives | Follow‑up dialogue offered to personnel and relatives | — |
| Liability / culpability | — | — | — | — | — | Legal liability clarified | — | — | — |
| Comments | — | Responsibility unclear; no follow‑up procedures for staff or relatives | Delay before Police notified; no follow‑up procedures | Checklist well adapted to risk and response needs; no follow‑up | Police contacted last; Relatives not contacted; Instructions prioritises home‑help service | Emphasises need for early Police alert, but instructions delay this | Notes importance of early alert, but procedures delay Police contact | No written prevention instructions Late Police contact No guidance on relatives or follow‑up | Instructions refer to an inaccessible handbook (broken link) |
